# Supplementary material
Source: Springer Nature journal article supplement (https://www.springermedizin.de/resource/supplementary/12879_2013_2773_MOESM3_ESM.pdf/9445332)

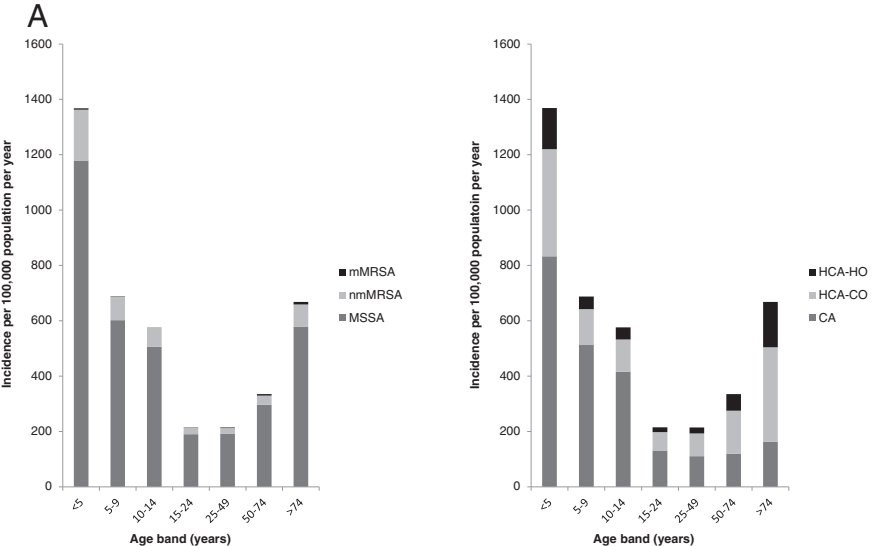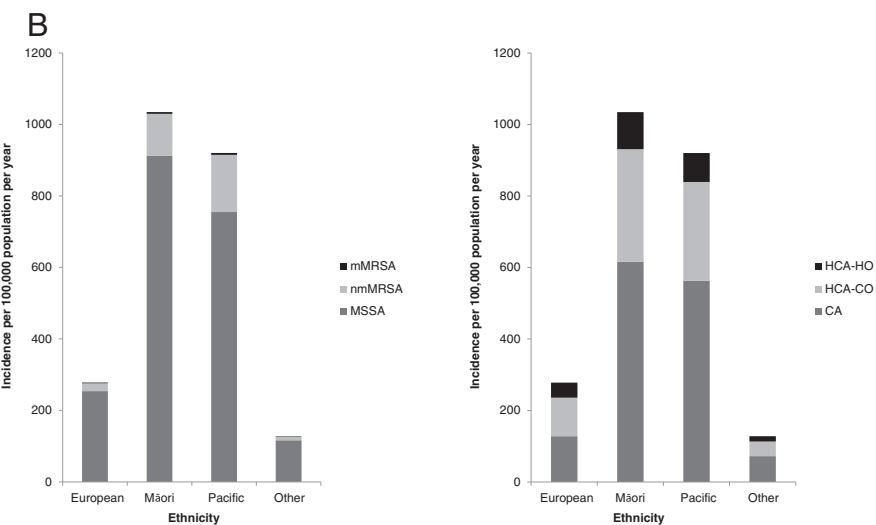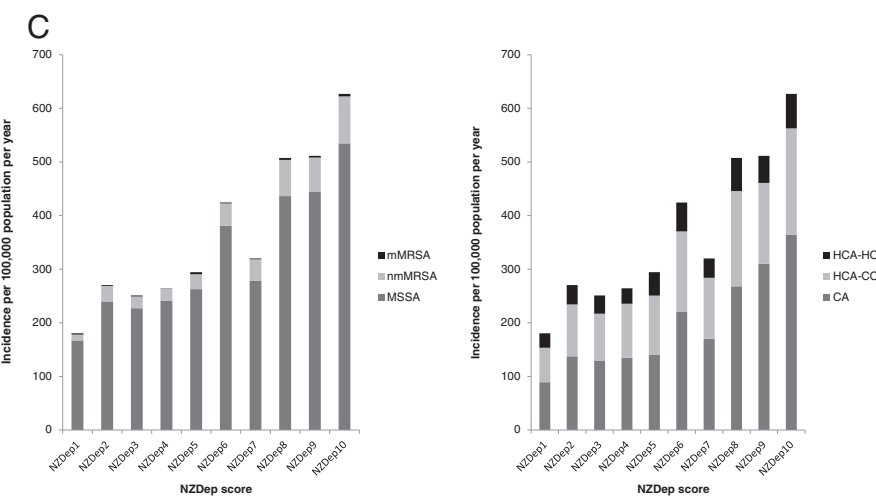

Supplement: MOESM3 [file 9445332]
